# Supplementary material for: GAMER-Ad: a novel and rapid method for generating recombinant adenoviruses
Source: PubMed Central journal article supplement — Mol Ther Methods Clin Dev. 2021 Feb 4;20:625–34. doi: 10.1016/j.omtm.2021.01.014 (PMC7907680; doi:10.1016/j.omtm.2021.01.014), 2021-02-04
Supplement: mmc1.pdf [file mmc1.pdf]

**OMTM, Volume 20**

## **Supplemental information**

### **GAMER-Ad: a novel and rapid method for generating recombinant adenoviruses**

**Firas Hamdan, Beatriz Martins, Michaela Feodoroff, Yvonne Giannoula, Sara Feola, Manlio Fusciello, Jacopo Chiaro, Gabriella Antignani, Mikaela Grönholm, Erkkö Ylösmäki, and Vincenzo Cerullo**

## Supplementary Material

### Poly-A fragment

5'-

gccgaagttcagatgactaactcagGGGCGCAGCTTGC GG GCGGCTTTCGTACAGGGTGC GG TCGCCCGG  
GCAGGGTATAACTCACCTGACAATCAGAGGGCGAGGTATTCAGCTCAACGACGAGTCGGTGAGCTC  
CTCGCTTGGTCTCCGTCCGGACGGGACATTTAGATCGGCGGCCGCGCCGCTCTTCATTCACGCCT  
CGTCAGGCAATCCTAACTCTGCAGACCTCGTCCTCTGAGCCGCGCTCTGGAGGCATTGGAACCTGC  
AATTTATTGAGGAGTTTGTGCCATCGGTCTACTTTAACCCTTCTCGGGACCTCCCGGCCACTATCCG  
GATCAATTTATTCTAACTTTGACGCGGTAAAGGACTCGGCGGACGGCTACGACTGAATGTTAAGTG  
GAGAGGCAGAGCAACTGCGCCTGAAACACCTGGTCCACTGTGCGCCGCAAGTGCTTTGCCCGCG  
ACTCCGGTGAGTTTTGCTACTTTGAATTGCCCGAGGATCATATCGAGGGCCCGGCGCACGGCGTCCG  
GCTTACCGCCCAGGGAGAGCTTGCCCGTAGCCTGATTCGGGAGTTTACCCAGCGCCCCCTGCTAGTT  
GAGCGGGACAGGGGACCCTGTGTTCTCACTGTGATTTGCAACTGTCCTAACCTGGATTACATCAAG  
ATCTTTGTTGCCATCTCTGTGCTGAGTATAATAAATACAGAAATTAATATACTGGGGCTCCTATCG  
CCATCCTGTAAACGCCACCGTCTTCACCCGCCAAGCAAACCAAGGCGAACCTTACCTGGTACTTTTA  
ACATCTCTCCCTCTGTGATTTACAACAGTTTCAACCCAGACGGAGTGAGTCTACGAGAGAACCTCTCC  
GAGCTCAGCTACTCCATCAGAAAAACACCACCTCCTTACCTGCCGGGAACGTACGAGTGCGTCAC  
CGGCCGCTGCACCACACCTACCGCCTGACCGTAAACCAGACTTTTTCCGGACAGACCTCAATAACTCT  
GTTTACCAGAACAGGAGGTGAGCTTAGAAAACCTTAGGGTATTAGGCCAAAGGCGCAGCTACTGT  
GGGGTTTTTTACTAAGTTACAAAGCTAATGTCACCACTAACTGCTTTACTCGCTGCTTGCAAAACAAA  
TTCAAAAAGTTAGCATTATAATTAGAATAGGATTTAAACCCCCGGTCATTTCTGCTCAATACCATT  
CCCTGAACAATTGACTCTATGTGGGATATGCTCCAGCGCTACAACCTTGAAGTCAGGCTTCTGGAT  
GTCAGCATCTGACTTTGGCCAGCACCTGTCCCGCGGATTTGTTCCAGTCCAACCTACAGCGACCCACCC  
TAACAGAGATGACCAACACAACCAACGCGGCCGCGCTACCGGACTTACATCTACCACAAATACACC  
CCAAGTTTCTGCCTTTGTCAATAACTGGGATAACTTGGGCATGTGGTGGTTCTCCATAGCGCTTATGT  
TTGTATGCCTTATTATTATGTGGCTCATCTGCTGCCTAAAGCGCAAACGCGCCCCGACCACCCATCTAT  
AGTCCCATCATTGTGCTACACCCAAACAATGATGGAATCCATAGATTGGACGGACTGAAACACATGT  
TCTTTTCTCTTACAGTATGATTAATGAGACATGATTCCTCGAGTTTTTATATTACTGACCCTTGTTGC  
GCTTTTTTGTGCGTGCTCCACATTGGCTGCGGTTTCTCACATCGAAGTAGACTGCATTCCAGCCTTCA  
CAGTCTATTTGCTTTACGGATTTGTCACCCTCACGCTCATCTGCAGCCTCATCACTGTGGTCATCGCT  
TTATCCAGTGCATTGACTGGGTCTGTGTGCGCTTTCATATCTCAGACACCATCCCCAGTACAGGGAC  
AGGACTATAGCTGAGCTTCTTAGAATCTTTAATTATGAAATTTACTGTGACTTTTCTGCTGATTATTT  
GCACCCTATCTGCGTTTTGTCCCCGACCTCCAAGCCTCAAAGACATATATCATGCAGATTCACCTCGT  
ATATGGAATATTCCAAGTTGCTACAATGAAAAAGCGATCTTCCGAAGCCTGGTTATATGCAATCAT  
CTCTGTTATGGTGTCTGCAGTACCATCTTAGCCCTAGCTATATATCCCTACCTTGACATTGGCTGGAA  
CGCAATAGATGCCATGAACCACCCAACCTTCCCCGCGCCCGCTATGCTTCCACTGCAACAAGTTGTTG  
CCGCGCGCTTTGTCCCAGCCAATCAGCCTCGCCCACCTTCTCCACCCCCACTGAAATCAGCTACTTT  
AATCTAACAGGAGGAGACGACTGACCTGAGAGACAAAAAATTCCAACACACTATTGCAATGAAA  
ATAAATTTCTTTATTAGCCAGAAGTCAGATGCTCAAGGGGCTTCATGATGTCCCATAATTTTTGGC  
AGAGGGAAAAAGATCTCAGTGGTATTTGTGAGCCAGGGCATTGGCCACACCAGCCACCACCTTCTG  
ATAGGCAGCCTGCACCTGAGGAGTGCGGCCGCTTTATCA-3'

### CMV Fragment

5'-

Cagctctgcttatatagacctccaccgtacacgcctaccgccatttgcgtcaatggggcggagttgttacgacatttggaaagtc  
ccgttgatttgggtccaaaactcccattgacgtcaatgggggtggagactggaaatcccgtgagtcaaaccgctatccacg  
ccattgatgtactgcaaaaaccgcatcaccatggtaatagcgaatgactaatacgtagatgtactgccaagtaggaaagtcata  
aggtcatgtactgggcataatgccaggcgggccatttaccgtcattgacgtcaatgggggcgtacttggcatatgatacattgat  
gtactgccaagtgggcagtttaccgtaaatactccaccattgacgtcaatggaaagtcctattggcgttactatgggaacatacgt  
cattattgacgtcaatgggcgggggtcgttgggcggtcagccaggcgggccatttaccgtaagtatgtaacgAAAAAATAAT  
AAAGCATCACTTACTTAAAATCAGTTAGCAAATTTCTGTCCAGTTTATTCAGCAGCACCTCCTTGCCCT  
CCTCCAGCTCTGGTATTGCAGCTTCCTCCTGGCTGCAAATTTCTCCACAATCTAAATGGAATGTCA  
GTTTCCTCCTGTTcctgtccatccgcaccactat-3'

**Fig.S1. Sequences of the Poly-A and CMV fragments**
